# Supplementary material for: Pressure-induced planar N6 rings in potassium azide
Source: PubMed Central journal article supplement — Sci Rep. 2014 Mar 12;4:4358. doi: 10.1038/srep04358 (PMC3950634; doi:10.1038/srep04358), 2014-03-12

## Supplementary information

### Pressure-induced planar N<sub>6</sub> rings in potassium azide

Jie Zhang<sup>1</sup>, Zhi Zeng<sup>1,2,3,\*</sup>, Hai Qing Lin<sup>2</sup>, and Yan Ling Li<sup>4</sup>

<sup>1</sup>Key Laboratory of Materials Physics,

Institute of Solid State Physics, CAS, and Department of Physics,

University of Science and Technology of China, Hefei 230031, China

<sup>2</sup>Beijing Computational Science Research Center, Beijing 100084, China

<sup>3</sup>Kavli Institute for Theoretical Physics China, CAS, Beijing 100190, China

<sup>4</sup>Department of Physics, Xuzhou Normal University, Xuzhou 221116, China

Table S1. Structural parameters of metastable phases of KN<sub>3</sub> at 100 GPa.

| Space group | Lattice parameters( $\text{\AA}$ , $^\circ$ )                                | Atomic coordinates(fractional)  |
|-------------|------------------------------------------------------------------------------|---------------------------------|
| Imma        | $a=4.740, b=4.034, c=6.245$<br>$\alpha=\beta=\gamma=90$                      | K $4e$ (0.0000, 0.2500, 0.3271) |
|             |                                                                              | N $4e$ (0.0000, 0.2500, 0.9421) |
|             |                                                                              | N $8i$ (0.2569, 0.2500, 0.6438) |
| $P\bar{1}$  | $a=5.002, b=2.799, c=5.017$<br>$\alpha=81.629, \beta=111.488, \gamma=74.331$ | K $2i$ (0.0481, 0.2675, 0.3157) |
|             |                                                                              | N $2i$ (0.6327, 0.0237, 0.0558) |
|             |                                                                              | N $2i$ (0.3153, 0.7159, 0.1381) |
|             |                                                                              | N $2i$ (0.5470, 0.5328, 0.3966) |

Fig. S1. The electronic band structure of I4/mcm phase at 0 GPa.

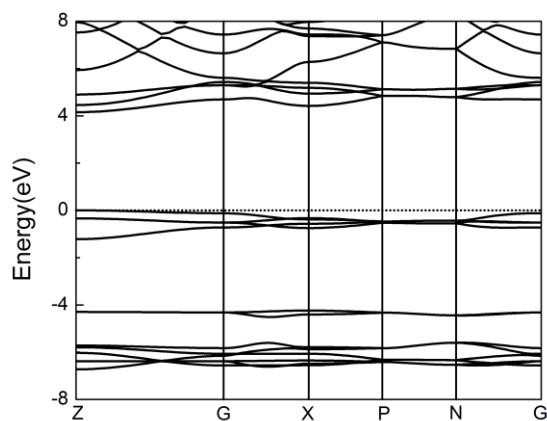

Fig. S2. The electronic band structure of C2/m phase at 30 GPa.

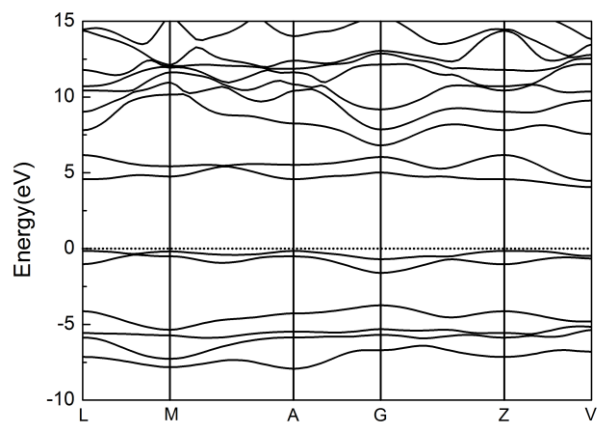

Fig. S3. The electronic band structure of Imma phase at 100 GPa.

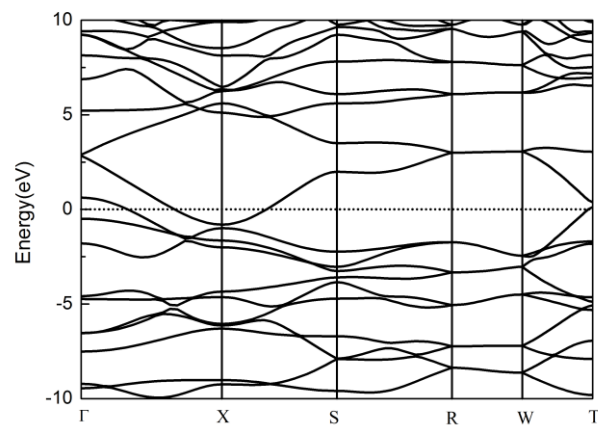

Fig. S4. The electronic band structure of  $P\bar{1}$  phase at 100 GPa.

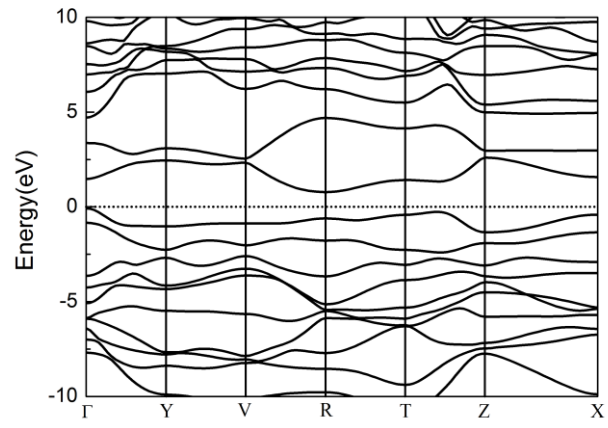

Supplement: srep04358-s1.pdf [file srep04358-s1.pdf]
